# Supplementary material for: UV-exposure, endogenous DNA damage, and DNA replication errors shape the spectra of genome changes in human skin
Source: PLoS Genet. 2021 Jan 14;17(1):e1009302. doi: 10.1371/journal.pgen.1009302 (PMC7808690; doi:10.1371/journal.pgen.1009302)
Supplement: S8 Table — a) The contributions of previously determined mutation signatures using MutationalPatterns. b) The number of mutations corresponding to each signature identified by SigProfilerExtractor (XLSX) [file pgen.1009302.s017.xlsx]

## Sheet: Legend
S8 Table
Agnostic indel signature analysis
S8a	The contributions of previously determined mutation signatures using MutationalPatterns
S8b	The number of mutations corresponding to each signature identified by SigProfilerExtractor

## Sheet: S8a
Sample	ID1	ID2	ID3	ID4	ID5	ID6	ID7	ID8	ID9	ID10	ID11	ID12	ID13	ID14	ID15	ID16	ID17
D1-R-H2	0	1.06323	6.57438	0	0	0.0111276	0	3.44344	0	0	0	0	3.37095	0	1.0021	0	0.0724862
DAG_H132	0	0	12.4473	0	0	0	0	6.60024	0	0	0	0	6.43098	0	0.308395	0	0
DAG_H171	0	1.69741	0	4.1737	0	0	0	10.5212	0	0	3.23677	0	6.02895	0	7.23324	3.74414	0
D1-L-H	0	1.87298	9.79936	0.0155756	0	0	0	11.0657	0	0	0	0	6.39018	0	3.27282	0	0
D2-L-H	0.394234	4.1422	0	1.14194	0	0	0	26.6013	0	0	1.89589	0	4.07217	0	6.50363	0	0
D2-R-H	0.658024	0	0	0	0	0	0	19.7265	0	0	0	0	0.823167	0	1.14504	0	0
D1-R-H1	0	2.42052	2.09031	0	10.5267	0	0	11.0961	0	0	0	0	0.568592	5.49465	6.84538	3.28172	0.298666
DAG_H61	0.342153	2.81482	4.31439	1.09231	0	0	0	17.726	0	0	0	0	9.18983	0	6.30412	2.49379	0
DAG_H70	1.80095	1.00087	6.35656	2.59721	0	0	1.06062	10.239	0	0	0	0	0	0	1.44085	0	0
DAG_H94	0	0.909444	0	0	1.4692	0	0	17.8635	0	0	0	0	3.31736	0	0	0.213811	0
DAG_H95	0	2.77725	0	0	0	0	0	33.9961	0	0	0	0	7.32776	0.513496	5.48828	0	1.08676
DAG_H213	2.87887	2.06353	9.25113	0	0	0	0	8.01654	0	0	0	0	0.819978	0	2.2403	0	0
DAG_H265	0	2.84817	7.20458	0	0	0	0	4.35962	0	0	0.520557	0	7.24383	0	8.54004	0	0.245645
DAG_H104	0	1.62543	0	4.76486	0	0	0	48.7116	0	0	0.687101	0	9.71553	0	0	0	0
DAG_H272	1.84257	2.19152	0	0	0	0	5.88525	13.4496	0.163825	0	0	0	0.549999	0	5.07623	0	0
DAG_H125	21.0797	12.1592	10.7526	0	0	0	8.75784	0	0	0	0	0	0.763608	0	0	4.46582	0.245323
DAG_H11	0.419081	0.904334	0	0	0.0119883	0	0	0	0	0	2.49758	0	9.34331	1.9337	1.80341	0	0
DAG_H270	0	0	0	1.42489	1.33843	0	0	52.7914	0	0	0	0	3.18624	0	17.8347	0	0.590103
DAG_H64	1.06368	0.199571	9.00884	0	0	0	0	32.2675	0	0	5.42858	0	1.00237	0	6.9987	0	0
DAG_H186	0	4.17811	0	0	1.02755	0	0	18.4797	0	0	3.29657	0	2.02279	0	7.65257	0	0.269395
DAG_H216	0	5.76319	3.55439	0.888771	0	0	0	5.54709	0	0	1.01378	0	3.15539	1.29857	1.92815	0	0
DAG_H223	13.1942	4.73586	1.4284	0	0	0	5.79577	0	0	0	0	0	0	1.08613	1.58694	4.26797	0.729206
DAG_H293	0	0.254922	0	0	0	0	0	31.5299	0	0	0	0	7.51	1.56525	6.04045	0	0
DAG_H294	0	3.59078	0	0.499501	0	0	0	30.5063	0	0	0	0	8.45403	0	13.1801	0	0
DAG_H275	1.98505	1.10304	5.92649	0	0	0	0.962548	3.33033	0	2.75427	0	0	1.45669	0	0	2.10568	0
DAG_H340	0.997171	0	0	0	0	0.757678	0.813976	4.0092	0	0	0	0	0	0.0175646	0.0546878	0	0.342861
DAG_H333	0	2.02884	4.66606	0	1.43171	0	0	10.8088	0	0	0	0	0	0	2.84627	0	0
DAG_H320	2.71941	9.5069	6.91565	0	0	0	0	13.908	0	0	2.35931	0	0.937173	0	0	0	0
DAG_H345	0.63162	0	2.69191	2.72617	2.06034	0	0	17.5438	0	0	0	0	0	0	12.6348	0	1.17024
DAG_H366	0	4.63315	0	0	6.22564	1.39453	0	1.48675	0	0	0	0	0	0	0.614574	0	0
DAG_H367	3.09555	2.32976	0.713856	0.219251	0	0.938101	2.178	1.63396	0	1.0337	0.102096	0	3.55279	0	0	2.36553	0
DAG_H355	0.867836	3.50509	5.7391	0.0563843	0.925489	0	0	2.93548	0	0	0	0	0	0	0	0.0030329	0
DAG_H315	0	0.867847	5.23395	1.98581	0	0	0	4.7729	0	0	0	0	2.90324	0	2.93777	0	0
DAG_H316	0	0.920012	0.962577	1.7626	1.94668	0	0	0	0	0	0	0	3.00482	0	2.70432	3.45596	0
DAG_H347	0.685315	4.60924	3.53989	0	0.241731	0	0	12.9882	0	0	0.989831	0	1.00629	0	1.39917	0	0.604889
DAG_H349	0	5.50145	0.707774	0.305891	5.25162	0	0	11.2312	0	0	0	0	1.50231	0	4.00936	0	0
DAG_H353	0	1.05437	2.61545	0.195554	0	0	0	7.47923	0	0	0	0	1.63675	0	0	1.35596	0
DAG_H63	7.7581	0	0	0.218659	0	0	2.08349	3.61482	0	0	0	0	0.101943	0	0.03714	2.85567	0.0777183
DAG_H82	0.823249	0	4.8865	0	0	0	0	4.61252	0	0	1.01363	0	1.15238	0	1.15757	0	0
DAG_H253	0	1.84899	1.49151	1.95829	0	0	0	14.5817	0	0	5.84796	0	0.414322	0	5.89997	0	0

## Sheet: S8b
Samples	ID1	ID2	ID7	Signature A
D1-R-H2	0	0	0	13
DAG_H132	0	0	0	20
DAG_H171	0	0	0	32
D1-L-H	0	0	0	27
D2-L-H	0	0	0	43
D2-R-H	0	0	0	17
D1-R-H1	2	2	2	37
DAG_H61	0	0	0	40
DAG_H70	2	0	3	19
DAG_H94	0	0	0	24
DAG_H95	0	0	0	48
DAG_H213	3	0	0	17
DAG_H265	0	0	0	27
DAG_H104	0	0	0	54
DAG_H272	0	0	7	19
DAG_H125	29	17	16	0
DAG_H11	2	0	0	13
DAG_H270	0	0	0	71
DAG_H64	0	0	0	47
DAG_H186	0	0	0	34
DAG_H216	0	5	0	14
DAG_H223	21	7	9	0
DAG_H293	0	0	0	40
DAG_H294	0	0	0	51
DAG_H275	3	0	3	13
DAG_H340	1	0	1	5
DAG_H333	0	0	0	20
DAG_H320	3	7	0	21
DAG_H345	0	0	0	37
DAG_H366	0	6	1	6
DAG_H367	5	3	4	9
DAG_H355	1	3	0	8
DAG_H315	0	0	0	15
DAG_H316	0	1	0	12
DAG_H347	0	3	0	23
DAG_H349	0	4	0	20
DAG_H353	0	0	0	13
DAG_H63	11	0	4	5
DAG_H82	1	0	0	10
DAG_H253	0	0	0	27
